# Supplementary material for: Survival benefit from liver transplantation for patients with and without hepatocellular carcinoma
Source: PubMed Central journal article supplement (PMC10685016; doi:10.1016/j.jhepr.2023.100907), 2023-09-13

# Survival benefit from liver transplantation for patients with and without hepatocellular carcinoma

Ben F.J. Goudsmit, Ilaria Prosepe, Maarten E. Tushuizen, Vincenzo Mazzaferro, Ian P.J. Alwayn, Bart van Hoek, Andries E. Braat, Hein Putter

|                                    |    |
|------------------------------------|----|
| Table of contents                  |    |
| Supplement 1 .....                 | 2  |
| Table S1 .....                     | 4  |
| Table S2 .....                     | 6  |
| Table S3 .....                     | 7  |
| Table S4 .....                     | 8  |
| Table S5 .....                     | 9  |
| Supplementary figure legends ..... | 10 |
| Fig. S1 .....                      | 11 |
| Fig. S2 .....                      | 11 |
| Fig. S3 .....                      | 13 |
| Fig. S4 .....                      | 14 |
| Fig. S5 .....                      | 15 |
| Fig. S6 .....                      | 16 |
| Fig. S7 .....                      | 17 |

## Supplement 1: in-depth statistical methods to calculate waiting list survival and model performance

The waiting list survival was estimated following the methodology described by Gong and Schaubel<sup>1</sup> (2013). They proposed the use of a partly conditional method to create a model that correctly mimics the need to estimate survival at specific moments in calendar time on cross-sections of patients rather than on follow-up time points on a cohort of patients. In their work, a set on evenly spaced calendar dates (cross-sections) is created and survival is estimated from those times onwards. Moreover they suggested some valid adaptations of IPCW to correct for the dependent censoring of transplanted patients in the created framework.

In short, based on observed waiting list data, we calculated patient survival in absence of treatment, much like the control group of a randomized controlled trial (RCT).

In order to avoid excessive computational burden, we opted for biweekly cross-sections. Patients were randomly assigned to train data and test data, with a percentage of 67% and 33% respectively. In particular, in order to preserve these percentages in the post-transplantation model, we first randomly split the transplanted patients into 67% train and 33% test and then we widened the two groups with, respectively, the 67% and 33% of patients who never received transplantation.

At each cross-section  $k$  ( $CS_k$ ), for each patient  $i$  having covariates  $Z_i(t)$ , weights for IPCW were estimated following the indication of the paper for the type B weights:

$$W_{ik}^B(t) = Y_{ik} \epsilon_{ik} \frac{\exp\{-\Lambda_{ik}^T(t)\}}{\exp\{-\Lambda_i^T(S_{ik} + t) + \Lambda_i^T(S_{ik})\}}$$

where  $Y_{ik}$  is an indicator that takes value 1 if patient  $i$  has not been transplanted yet at cross-section  $k$  and 0 otherwise,  $\epsilon_{ik}$  is an indicator that takes value 1 if patient  $i$  is active at cross-section  $k$  and 0 otherwise,  $S_{ik}$  is the time from  $i$ -patient's first eligibility to cross-section  $k$ , and  $\Lambda_i^T(t)$  and  $\Lambda_{ik}^T(t)$  are the cumulative hazard of the treatment models  $\Lambda_i^T(t) = \int_0^t \epsilon_i(u) \lambda^T(u) \exp\{\theta_0 Z_i(u)\} du$  and  $\Lambda_{ik}^T(t) = \int_0^t \epsilon_{ik}(u) \lambda_k^T(u) \exp\{\theta_1 Z_i(S_{ik})\} du$ .

These two partly conditional hazard regression models, used to track transplantation chances at each time-point, were estimated using the whole population. In fact, given the choice to divide patients into train and test data randomly, we have assumed that the underlying transplantation model would be the same in the two groups.

The waiting list model was estimated as a weighted partly conditional hazard regression as recommended in the Gong and Schaubel paper, with hazard

$$\lambda_{0k}(t; s | Z_i(S_{ik}), \epsilon_{ik} = 1) = \lambda_k(t) \exp\{\beta Z_i(S_{ik})\}.$$

Survival benefit was then defined as the life-years gained from the moment of transplantation during the next five years (Figure 1).<sup>12,29</sup> Survival benefit was calculated as the difference between the observed posttransplant survival and patient survival on the waiting list survival (described here above) had the patient not been transplanted.

Briefly, we did not use intention-to-treat (ITT) or competing risk analysis, because 1) we wanted to best approximate a RCT setting, 2) wanted to prevent underestimation of mortality and subsequent

undertreatment,<sup>33</sup> and 3) the intention was to model changes in waiting list disease over time beyond the moment of first listing.

Table S1: waiting list survival model summary

| Predictor                                    | coefficient | HR    | low95 | up95  | p      |
|----------------------------------------------|-------------|-------|-------|-------|--------|
| Age                                          | 0.035       | 1.04  | 1.03  | 1.04  | <0.001 |
| Female sex                                   | 0.100       | 1.10  | 1.03  | 1.18  | 0.005  |
| ABO – O                                      | ref         | ref   | ref   | ref   |        |
| ABO – A                                      | 0.017       | 0.983 | 0.913 | 1.058 | 0.647  |
| ABO – AB                                     | 0.28        | 1.322 | 1.027 | 1.704 | 0.031  |
| ABO – B                                      | 0.124       | 0.884 | 0.782 | 0.999 | 0.048  |
| Race White                                   | ref         | ref   | ref   | ref   |        |
| Race Black                                   | -0.17       | 0.843 | 0.741 | 0.96  | 0.01   |
| Race Hispanic                                | 0.024       | 0.976 | 0.887 | 1.073 | 0.618  |
| Race Other                                   | 0.154       | 0.857 | 0.705 | 1.041 | 0.12   |
| Disease Other                                | ref         | ref   | ref   | ref   |        |
| Disease ALD                                  | -0.19       | 0.827 | 0.754 | 0.907 | <0.001 |
| Disease HCV                                  | 0.179       | 0.836 | 0.759 | 0.922 | <0.001 |
| Disease HBV                                  | 0.594       | 0.552 | 0.376 | 0.811 | 0.002  |
| Disease HCC                                  | 0.298       | 0.742 | 0.624 | 0.883 | 0.001  |
| Diabetes                                     | 0.145       | 1.16  | 1.07  | 1.24  | <0.001 |
| Albumin                                      | -0.522      | 0.59  | 0.56  | 0.63  | <0.001 |
| Ascites None                                 | ref         | ref   | ref   | ref   |        |
| Ascites Slight                               | 0.093       | 1.10  | 1.00  | 1.20  | 0.039  |
| Ascites Moderate                             | 0.210       | 1.23  | 1.10  | 1.39  | <0.001 |
| MELD(-Na)                                    | 0.070       | 1.07  | 1.06  | 1.09  | <0.001 |
| log(42-MELD(-Na))                            | -0.820      | 0.44  | 0.36  | 0.54  | <0.001 |
| Sodium                                       | -0.049      | 0.95  | 0.94  | 0.96  | <0.001 |
| CPS grade A                                  | ref         | ref   | ref   | ref   |        |
| CPS grade B                                  | 0.054       | 1.055 | 0.954 | 1.167 | 0.295  |
| CPS grade C                                  | 0.186       | 1.205 | 1.06  | 1.369 | 0.004  |
| Log (AFP + 1)                                | 0.194       | 1.21  | 1.17  | 1.27  | <0.001 |
| Log (TTD +1)                                 | 0.134       | 1.14  | 1.02  | 1.28  | 0.024  |
| AFP difference with previous                 | 0.155       | 1.17  | 1.06  | 1.29  | 0.002  |
| Exception for HCC outside policy             | 0.452       | 1.57  | 1.33  | 1.86  | <0.001 |
| Exception * MELD(-Na) interaction            | -0.054      | 0.95  | 0.91  | 0.98  | 0.005  |
| Policy exceptions 2005-03-16                 | ref         | ref   | ref   | ref   |        |
| Policy exceptions 2015-10-08                 | 0.254       | 1.29  | 1.03  | 1.61  | 0.026  |
| Policy exceptions 2017-12-12                 | 0.389       | 1.47  | 1.11  | 1.97  | 0.008  |
| Policy 2015-10-08 * waiting time interaction | 0.063       | 1.07  | 1.00  | 1.13  | 0.043  |
| Policy 2017-12-12* waiting time interaction  | 0.073       | 1.08  | 1.00  | 1.15  | 0.043  |
| Time of cross-section spline df 1            | 0.030       | 1.03  | 0.89  | 1.19  | 0.675  |
| Time of cross-section spline df 2            | -0.146      | 0.86  | 0.73  | 1.02  | 0.079  |
| Time of cross-section spline df 3            | -0.076      | 0.93  | 0.81  | 1.07  | 0.288  |
| Time of cross-section spline df 4            | -0.178      | 0.84  | 0.62  | 1.12  | 0.234  |

|                                   |        |      |      |      |        |
|-----------------------------------|--------|------|------|------|--------|
| Time of cross-section spline df 5 | -0.312 | 0.73 | 0.62 | 0.87 | <0.001 |
|-----------------------------------|--------|------|------|------|--------|

AFP: alpha-fetoprotein in ng/mL, TTD: total tumor diameter in cm, MELD(-Na): model for end-stage liver disease (sodium) score, HCC: hepatocellular carcinoma

---

Table S2: post-transplant survival model summary

| Predictor                | coefficient | HR   | low95 | up95 | p      |
|--------------------------|-------------|------|-------|------|--------|
| Recipient age spline df1 | 0.131       | 1.14 | 0.82  | 1.59 | 0.437  |
| Recipient age spline df2 | 0.556       | 1.74 | 1.36  | 2.24 | <0.001 |
| Recipient age spline df3 | 0.567       | 1.76 | 0.81  | 3.83 | 0.152  |
| Recipient age spline df4 | 1.060       | 2.89 | 1.72  | 4.86 | <0.001 |
| Disease ALD              | ref         | ref  | ref   | ref  | ref    |
| Disease HCV              | 0.238       | 1.27 | 1.13  | 1.42 | <0.001 |
| Disease NASH             | -0.062      | 0.94 | 0.83  | 1.07 | 0.348  |
| Disease Other            | -0.055      | 0.95 | 0.85  | 1.06 | 0.332  |
| Disease T2 HCC           | -0.329      | 0.72 | 0.61  | 0.85 | <0.001 |
| Disease not T2 HCC       | -0.244      | 0.78 | 0.66  | 0.93 | 0.006  |
| Race Other               | ref         | ref  | ref   | ref  | ref    |
| Race White               | 0.134       | 1.14 | 0.98  | 1.34 | 0.099  |
| Race Black               | 0.395       | 1.48 | 1.24  | 1.78 | <0.001 |
| Race Hispanic            | -0.021      | 0.98 | 0.82  | 1.18 | 0.825  |
| Diabetes                 | 0.248       | 1.28 | 1.19  | 1.38 | <0.001 |
| Dialysis                 | 0.215       | 1.23 | 1.10  | 1.40 | <0.001 |
| Ventilated               | 0.522       | 1.69 | 1.43  | 1.99 | <0.001 |
| Location home            | ref         | ref  | ref   | ref  | ref    |
| Location hospital        | 0.191       | 1.21 | 1.09  | 1.34 | <0.001 |
| Location ICU             | 0.251       | 1.29 | 1.11  | 1.49 | <0.001 |
| Total tumor diameter     | 0.062       | 1.06 | 1.04  | 1.08 | <0.001 |
| log(AFP + 1)             | 0.174       | 1.19 | 1.15  | 1.23 | <0.001 |
| DRI                      | 0.285       | 1.33 | 1.22  | 1.44 | <0.001 |

ALD: alcoholic liver disease, HCV: hepatitis C virus induced cirrhosis, NASH: non-alcoholic steatohepatitis, HCC: hepatocellular carcinoma, ICU: intensive care unit, AFP: alpha-fetoprotein, TTD: total tumor diameter in cm, MELD(-Na): model for end-stage liver disease (sodium) score

Table S3: Survival probability without and with LT *at* five years

| Survival probability at five years (%) |         |        |                      |           |         |        |                      |
|----------------------------------------|---------|--------|----------------------|-----------|---------|--------|----------------------|
| Without LT                             |         |        |                      | With LT   |         |        |                      |
| MELD(-Na)                              | non-HCC | T2 HCC | HCC outside criteria | MELD(-Na) | non-HCC | T2 HCC | HCC outside criteria |
| 6                                      | 83.6    | 52.8   | 39.8                 | 6         | 89.1    | 82.1   | 82.1                 |
| 7                                      | 80.9    | 48.7   | 33.9                 | 7         | 88.7    | 81.9   | 81.0                 |
| 8                                      | 74.8    | 42.3   | 29.6                 | 8         | 87.2    | 81.6   | 80.7                 |
| 9                                      | 60.5    | 35.9   | 25.6                 | 9         | 86.7    | 81.6   | 80.7                 |
| 10                                     | 57.9    | 33.0   | 21.7                 | 10        | 86.4    | 81.7   | 80.9                 |
| 11                                     | 54.0    | 26.7   | 20.8                 | 11        | 86.3    | 80.6   | 81.3                 |
| 12                                     | 47.8    | 25.2   | 15.5                 | 12        | 85.9    | 80.6   | 81.7                 |
| 13                                     | 45.9    | 23.0   | 13.2                 | 13        | 86.8    | 82.2   | 80.3                 |
| 14                                     | 39.7    | 18.8   | 9.7                  | 14        | 85.9    | 82.0   | 81.6                 |
| 15                                     | 36.5    | 14.6   | 10.4                 | 15        | 86.4    | 81.2   | 81.3                 |
| 16                                     | 31.0    | 16.5   | 10.1                 | 16        | 85.8    | 81.4   | 81.3                 |
| 17                                     | 28.8    | 11.3   | 5.3                  | 17        | 85.9    | 82.1   | 80.3                 |
| 18                                     | 24.7    | 11.0   | 5.2                  | 18        | 85.8    | 82.1   | 80.2                 |
| 19                                     | 21.7    | 7.6    | 5.9                  | 19        | 86.2    | 80.1   | 81.3                 |
| 20                                     | 17.7    | 7.8    | 7.9                  | 20        | 85.9    | 81.5   | 81.5                 |
| 21                                     | 16.1    | 11.0   | 3.2                  | 21        | 85.8    | 81.0   | 79.6                 |
| 22                                     | 14.1    | 8.6    | 2.9                  | 22        | 86.0    | 81.8   | 80.1                 |
| 23                                     | 11.1    | 2.8    | 0.8                  | 23        | 85.5    | 80.8   | 78.4                 |
| 24                                     | 10.4    | 2.9    | 2.7                  | 24        | 85.1    | 82.0   | 81.3                 |
| 25                                     | 8.5     | 4.0    | 0.9                  | 25        | 84.8    | 78.6   | 82.4                 |
| 26                                     | 6.8     | 3.8    | 0.7                  | 26        | 84.9    | 79.7   | 73.6                 |
| 27                                     | 5.9     | 2.1    | 0.1                  | 27        | 85.2    | 81.6   | 79.9                 |
| 28                                     | 4.9     | 1.0    | 5.9                  | 28        | 84.0    | 79.9   | 82.9                 |
| 29                                     | 3.6     | 0.1    | 0.1                  | 29        | 84.8    | 81.1   | 81.0                 |
| 30                                     | 2.5     | 2.9    | 0.7                  | 30        | 84.6    | 80.6   | 69.6                 |
| 31                                     | 1.8     | 1.2    | 1.0                  | 31        | 82.8    | 78.2   | 83.3                 |
| 32                                     | 1.9     | 0.2    | 0.4                  | 32        | 83.0    | 77.3   | 77.7                 |
| 33                                     | 1.4     | 0.6    | 0.0                  | 33        | 83.1    | 78.1   | 71.1                 |
| 34                                     | 0.4     | 0.0    | 0.0                  | 34        | 82.2    | 72.4   | 77.8                 |
| 35                                     | 0.7     | 0.1    | 2.5                  | 35        | 82.8    | 80.2   | 83.4                 |
| 36                                     | 0.2     | 0.0    | 0.0                  | 36        | 81.3    | 78.7   | 70.6                 |
| 37                                     | 0.1     | 0.0    | 0.0                  | 37        | 81.4    | 68.9   | 72.1                 |
| 38                                     | 0.0     | 0.0    | 0.0                  | 38        | 80.5    | 69.3   | 70.2                 |
| 39                                     | 0.0     | 0.0    | 0.0                  | 39        | 80.4    | 72.2   | 72.9                 |
| 40                                     | 0.0     | 0.0    | 0.0                  | 40        | 80.0    | 72.8   | 70.0                 |

Table S4: Mean benefit per MELD(-Na) score per (non-)HCC

| MELD(-Na) | No HCC       |        | T2 HCC       |        | outside T2 HCC |        |
|-----------|--------------|--------|--------------|--------|----------------|--------|
|           | mean benefit | number | mean benefit | number | mean benefit   | number |
| 6         | -0.32        | 114    | 0.12         | 333    | 0.57           | 315    |
| 7         | -0.27        | 120    | 0.24         | 600    | 0.70           | 612    |
| 8         | -0.20        | 126    | 0.42         | 633    | 0.88           | 666    |
| 9         | 0.19         | 165    | 0.65         | 621    | 1.06           | 558    |
| 10        | 0.25         | 225    | 0.79         | 546    | 1.23           | 552    |
| 11        | 0.35         | 318    | 0.97         | 582    | 1.33           | 405    |
| 12        | 0.51         | 354    | 1.02         | 453    | 1.58           | 306    |
| 13        | 0.64         | 378    | 1.21         | 444    | 1.63           | 312    |
| 14        | 0.83         | 441    | 1.45         | 384    | 1.96           | 261    |
| 15        | 0.96         | 735    | 1.63         | 333    | 1.93           | 255    |
| 16        | 1.14         | 831    | 1.55         | 321    | 1.96           | 177    |
| 17        | 1.23         | 822    | 1.94         | 210    | 2.24           | 219    |
| 18        | 1.42         | 858    | 1.96         | 210    | 2.32           | 135    |
| 19        | 1.57         | 876    | 2.02         | 156    | 2.31           | 126    |
| 20        | 1.75         | 822    | 2.13         | 129    | 2.23           | 96     |
| 21        | 1.87         | 846    | 1.95         | 96     | 2.55           | 102    |
| 22        | 2.02         | 936    | 2.18         | 135    | 2.39           | 51     |
| 23        | 2.19         | 933    | 2.50         | 69     | 2.69           | 57     |
| 24        | 2.23         | 999    | 2.60         | 60     | 2.67           | 36     |
| 25        | 2.36         | 912    | 2.44         | 54     | 2.94           | 33     |
| 26        | 2.48         | 819    | 2.36         | 63     | 2.44           | 21     |
| 27        | 2.57         | 789    | 2.85         | 36     | 2.98           | 9      |
| 28        | 2.59         | 756    | 2.80         | 39     | 2.75           | 9      |
| 29        | 2.80         | 828    | 3.09         | 30     | 2.98           | 12     |
| 30        | 2.91         | 792    | 2.75         | 33     | 2.56           | 27     |
| 31        | 2.94         | 636    | 2.90         | 27     | 3.02           | 9      |
| 32        | 2.98         | 792    | 2.89         | 33     | 2.90           | 12     |
| 33        | 3.07         | 714    | 2.68         | 21     | 2.62           | 9      |
| 34        | 3.19         | 543    | 2.87         | 9      | 3.05           | 6      |
| 35        | 3.25         | 753    | 3.09         | 12     | 2.74           | 6      |
| 36        | 3.27         | 624    | 3.05         | 15     | 2.65           | 15     |
| 37        | 3.36         | 549    | 2.64         | 30     | 2.87           | 9      |
| 38        | 3.37         | 591    | 2.80         | 18     | 2.85           | 9      |
| 39        | 3.41         | 486    | 2.89         | 21     | 2.99           | 9      |
| 40        | 3.45         | 2697   | 2.96         | 87     | 2.86           | 45     |



Table S5: Median benefit per total tumor burden progression and bridging.

*Median 5-year benefit from transplantation*

|                   | baseline |         | ttb 0 |         | ttb stable |         | ttb increase |         | ttb decrease |         |
|-------------------|----------|---------|-------|---------|------------|---------|--------------|---------|--------------|---------|
|                   | T2       | outside | T2    | outside | T2         | outside | T2           | outside | T2           | outside |
| <i>HCC</i>        |          |         |       |         |            |         |              |         |              |         |
| <i>downstaged</i> | 1,6      | 1,0     | 1,9   | 2,3     | 1,9        | 1,8     | 2,3          | 2,1     | 1,6          | 2,2     |
| <i>only LT</i>    | 1,9      | 1,6     | 1,9   | 3,0     | 2,3        | 2,1     | 2,3          | 2,1     | 1,6          | 2,2     |

*Number of patients stratified above*

|                   | baseline |         | ttb 0 |         | ttb stable |         | ttb increase |         | ttb decrease |         |
|-------------------|----------|---------|-------|---------|------------|---------|--------------|---------|--------------|---------|
|                   | T2       | outside | T2    | outside | T2         | outside | T2           | outside | T2           | outside |
| <i>HCC</i>        |          |         |       |         |            |         |              |         |              |         |
| <i>downstaged</i> | 232      | 161     | 9     | 316     | 302        | 161     | 209          | 209     | 797          | 382     |
| <i>only LT</i>    | 185      | 54      | 12    | 149     | 271        | 56      | 62           | 56      | 197          | 121     |

## Supplementary figure legends

1. The in- and exclusion flowchart.
2. Post transplantation survival plots of HCC patients, stratified based on three variables: MELD-Na score, serum AFP, and tumor diameter. The variable cut-offs are based on the most significant effect in the data. A high MELD-Na score is above 19, a high AFP level is above 24 ng/mL, and a high total tumor diameter is above 3.7 cm. Five-year postoperative survival is worst (<60%) for HCC patients with MELD-Na>19, AFP>24, and diameter >3.7.
3. Calibration plot of post-LT survival model. The blue line shows the estimated calibration, corrected for overfitting. The post-transplant predicted risks match the observed risks very well. Therefore, estimates are reliable.
4. Two layers from the decision tree algorithm used to predict benefit in secondary analysis. For each layer, the decision tree chooses the most relevant cut-off point in the data, e.g., the most important distinction is based on liver disease, and then MELD(-Na) score. Within each 'node' the number and average benefit is shown. The final decision tree used in this study has eight layers.
5. The relation between serum AFP levels at transplantation and 5-year benefit scores in HCC patients. Of note, because of the shape of the distribution, AFP levels are capped at 100 ng/mL, showing 95% of patients.
6. The distribution of benefit scores in HCC patients with varying changes in total tumor burden [TTB] (sum of HCC diameters) and pre-LT on the waiting list. The difference between TTB at transplantation and listing is used. Baseline refers to HCC patients with only one available TTB measurement. TTB 0 are patients coded in the SRTR data with diameter 0 cm. TTB stable, increase and decrease refer to TTB changes since listing.
7. The relation between changes in TTB from listing to transplantation and 5-year benefit scores. Of note: negative values correspond to a smaller TTB at transplantation as compared to listing.

Fig. S1: In- and exclusion chart

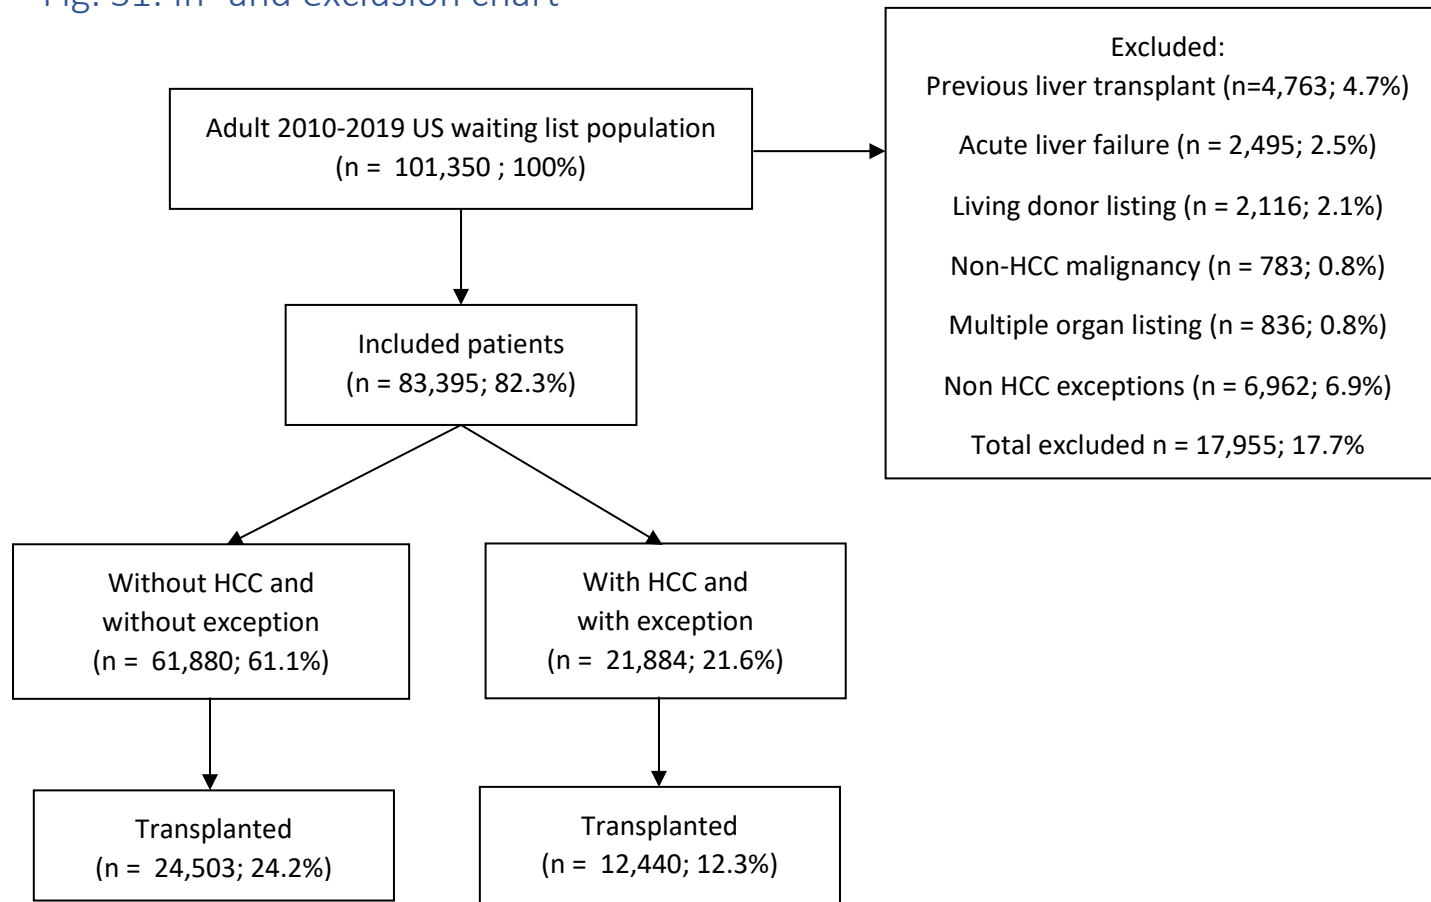

Fig. S2: post transplantation survival stratified for MELD(-Na) score, AFP and total tumor diameter

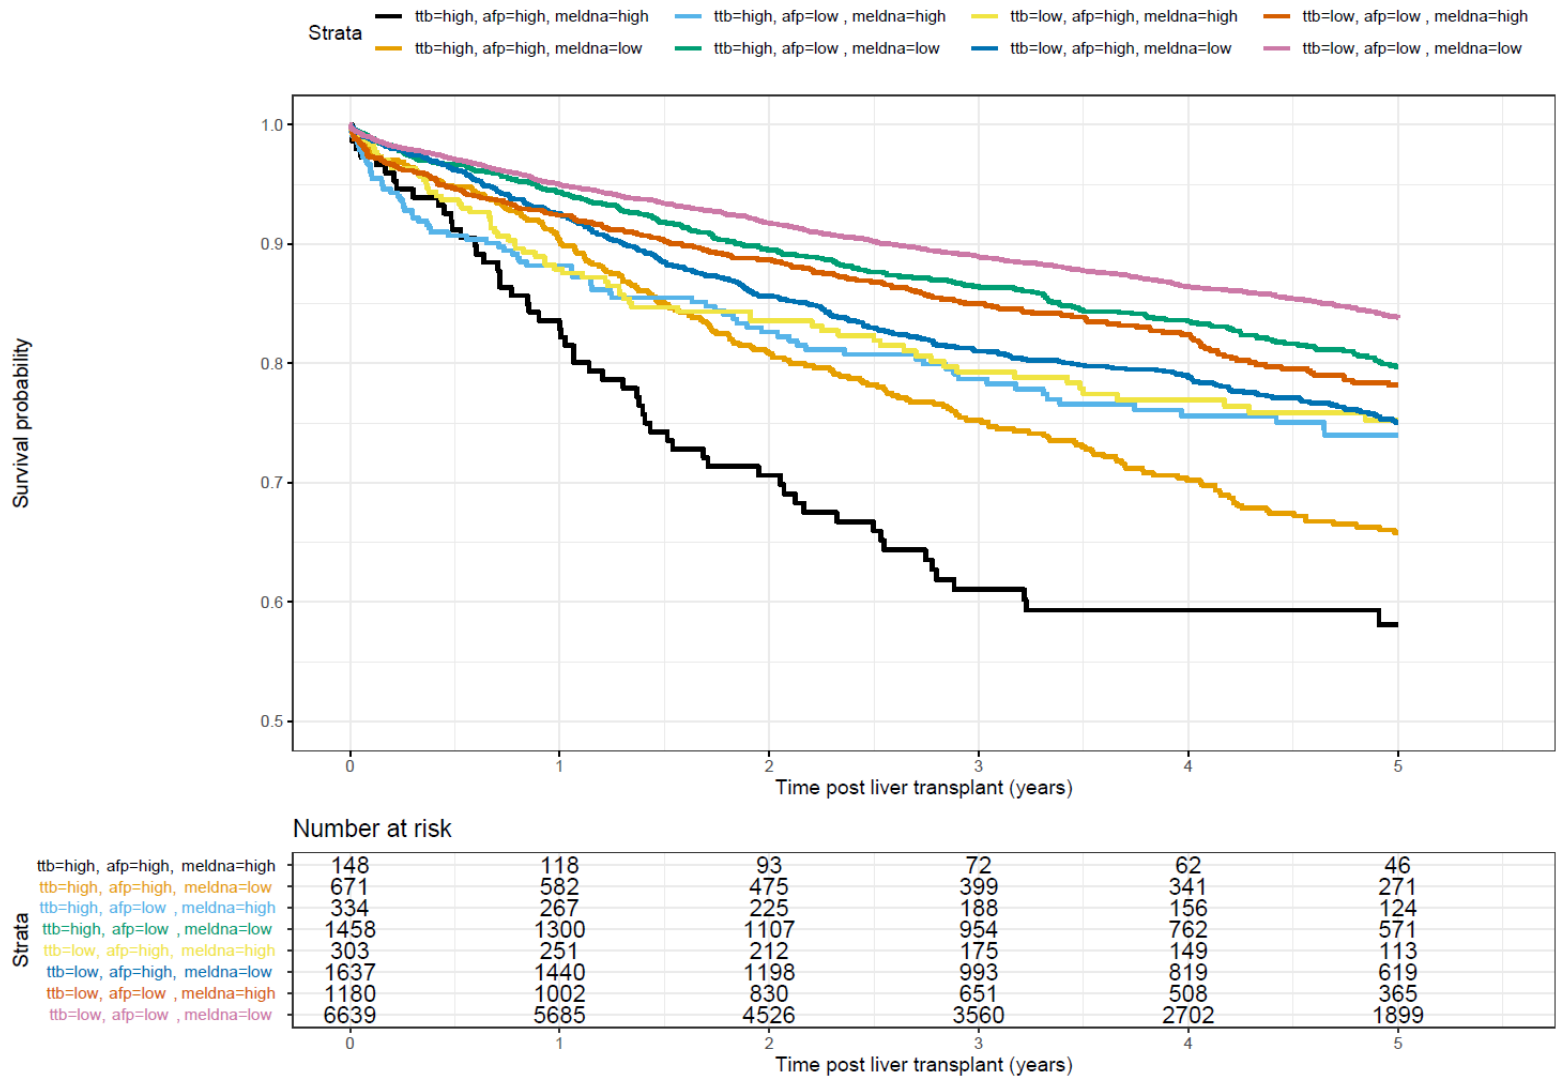

Fig. S3: post-transplantation model calibration

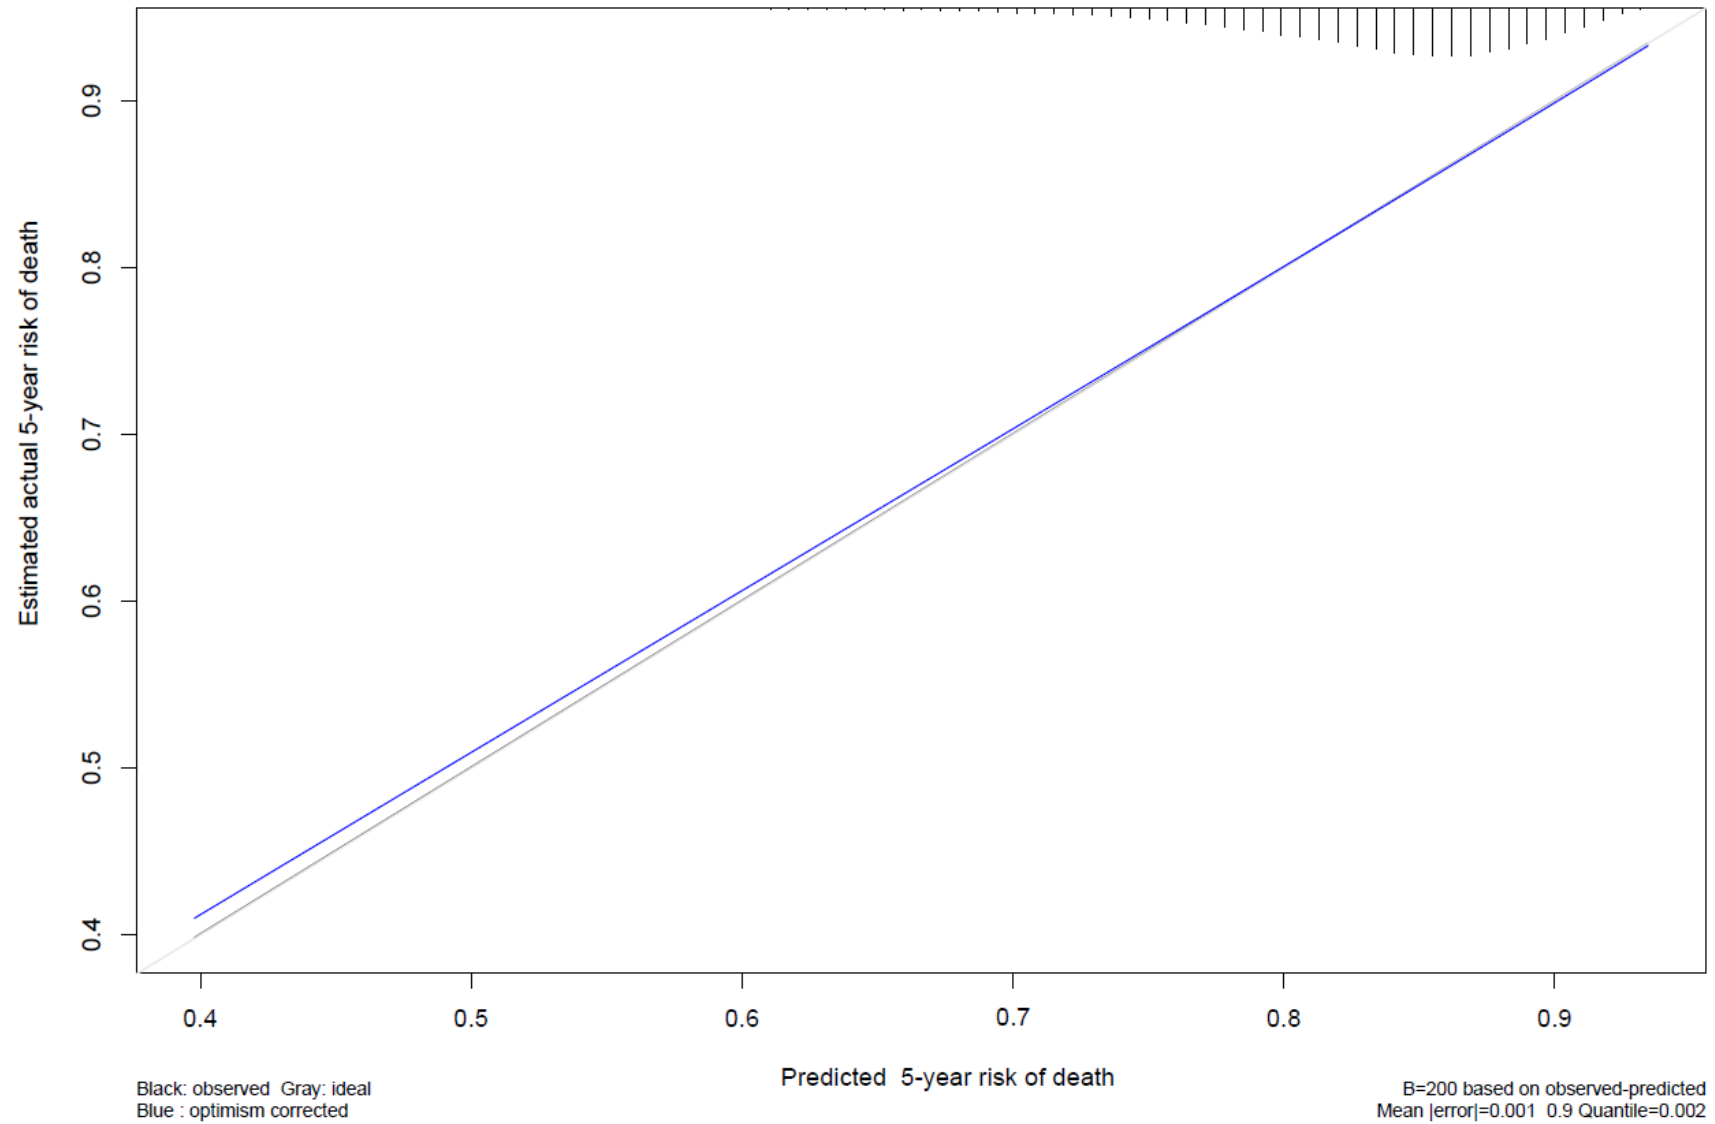

Fig. S4: Variable importance in benefit regression

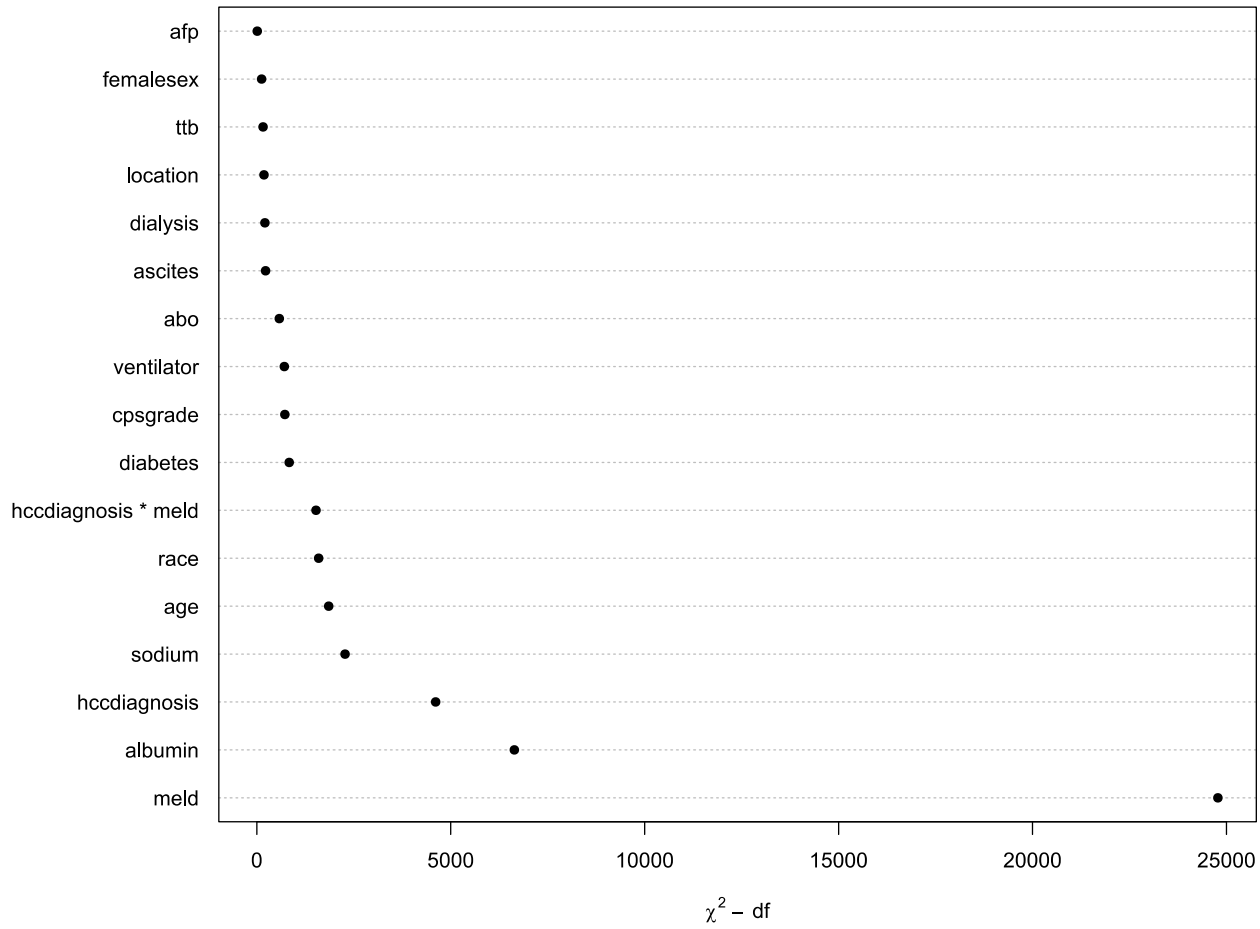

Fig. S5: 5-year benefit and AFP at transplantation.

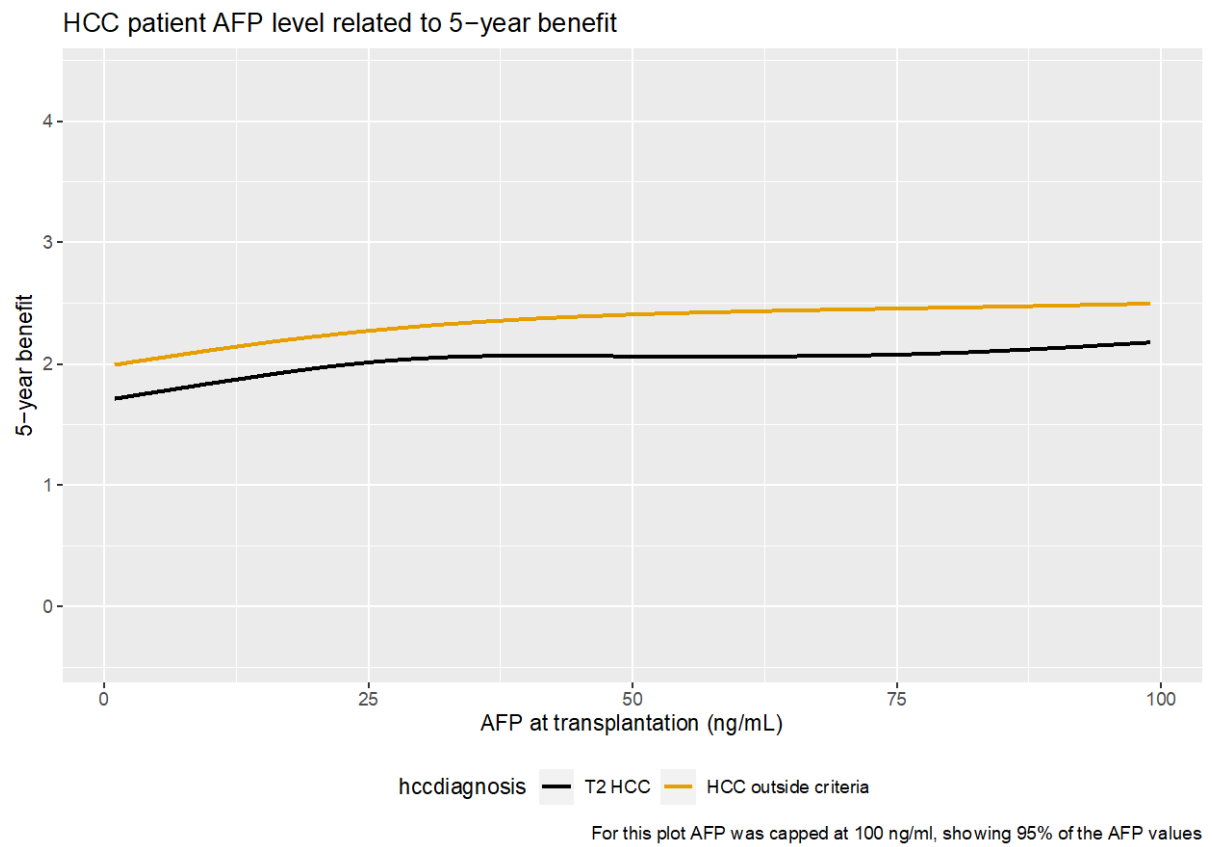

Fig. S6: Benefit distribution per total tumor burden progression and bridging.

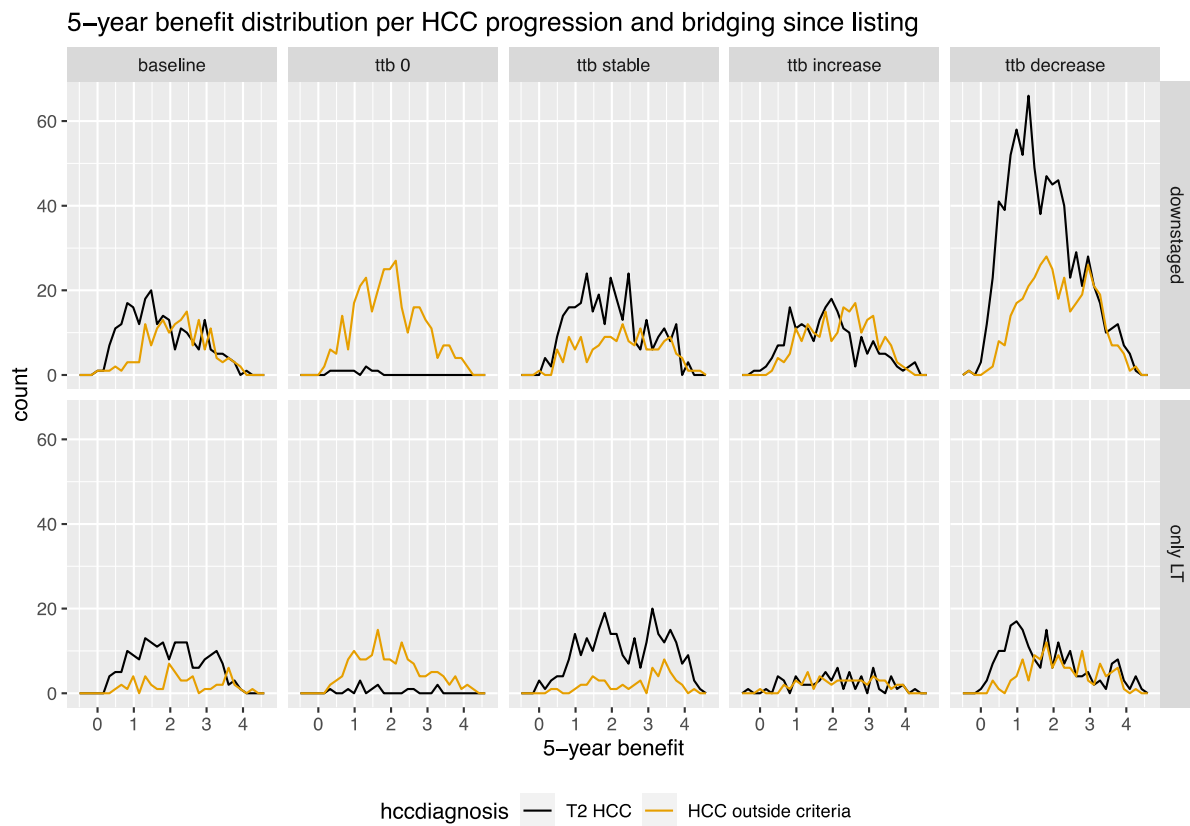



Fig. S7: Benefit per total tumor burden change from listing to transplantation.

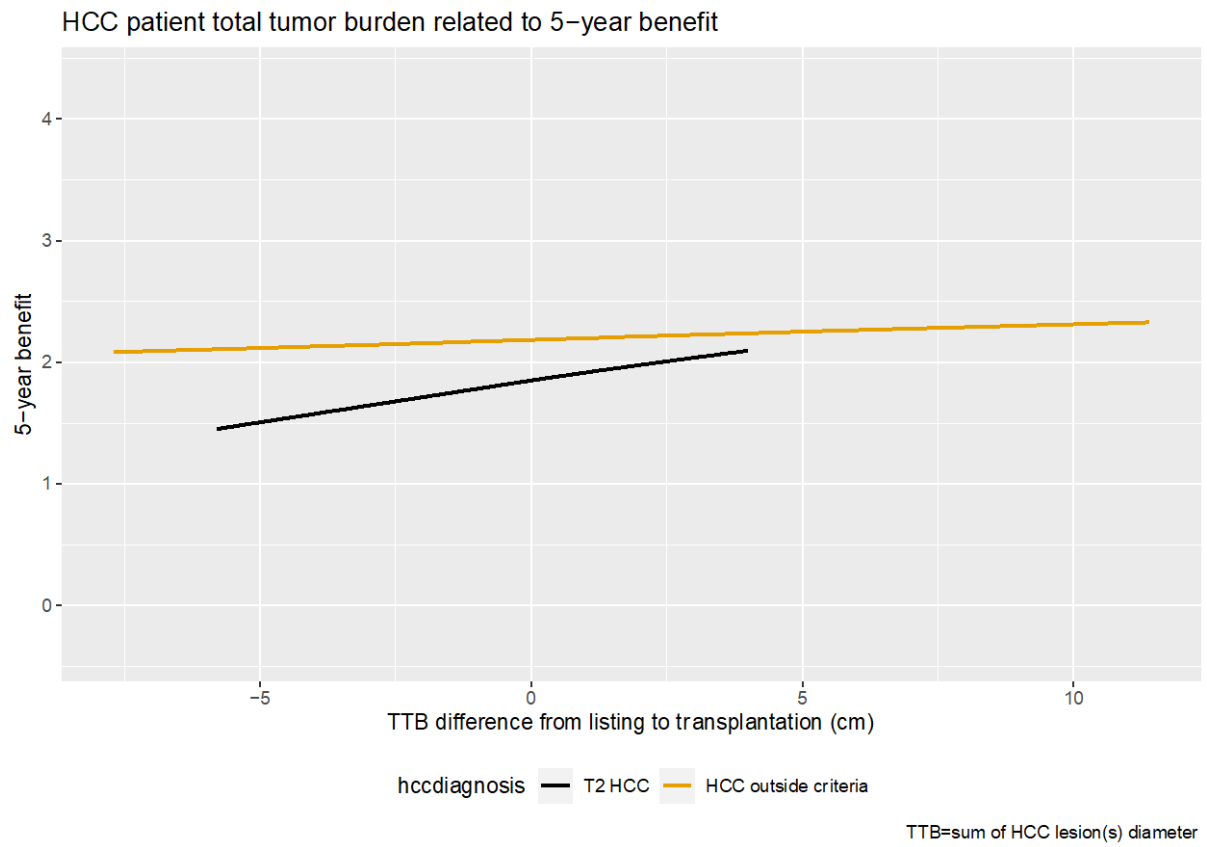

Supplement: mmc1.pdf [file mmc1.pdf]
